# Supplementary material for: Nomogram for predicting testicular yolk sac tumor in children based on age, alpha-fetoprotein, and ultrasonography
Source: PubMed Central journal article supplement (PMC11598321; doi:10.3389/fped.2024.1407120), 2024-11-13
Supplement: Datasheet1.pdf [file Datasheet1.pdf]

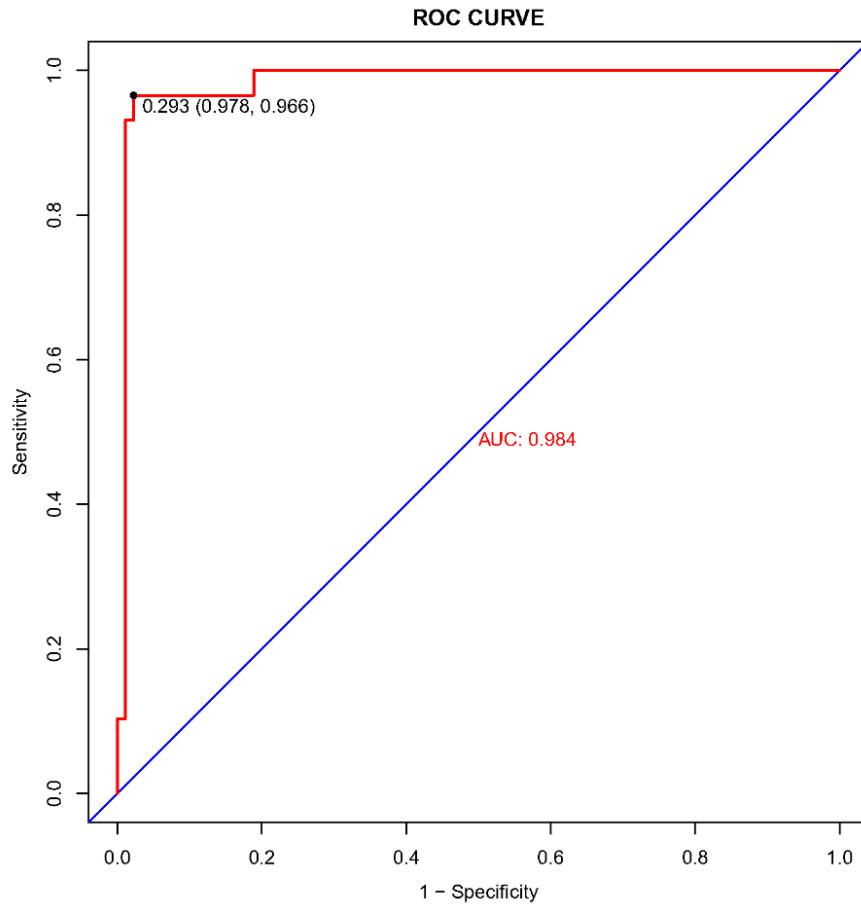

Supplementary Figure 1: Receiver operating characteristic curve for diagnosing testicular yolk sac tumor

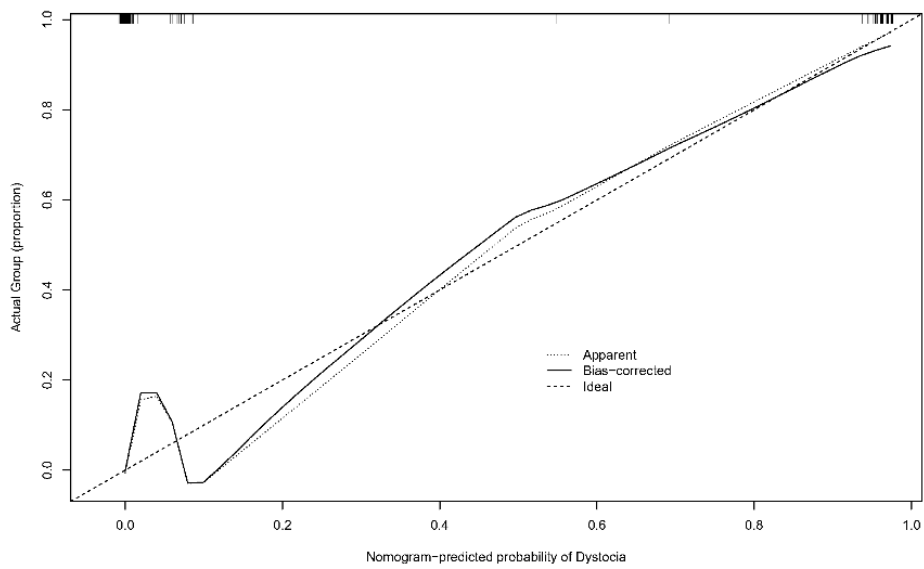

Supplementary Figure 2: Calibration plot for predicting the probability of testicular yolk sac tumor
